# Supplementary material
Source: PubMed Central journal article supplement (PMC3567732)
Supplement: 430d781f43b7ffa2ceaa88bc5229236c_genetics.112.145631-1.pdf [file 430d781f43b7ffa2ceaa88bc5229236c_genetics.112.145631-1.pdf]

**File S1**  
**Supporting Text**

**Cloning of the 82kb insert by recombineering-mediated gap repair**

Primers bacL-f and bacL\_NotI-r (with a 3' NotI site) were used to amplify a 500bp left arm of homology, and primers bacR\_NotI-f (with a 5' NotI site) and bacR-r were used to amplify a 500bp right arm of homology. The two arms were ligated after NotI digestion, and Ascl and EcoRI sites were added by a second round of PCR with bacL\_AscI-f and bacR\_EcoRI-r. The resulting 1000 bp product, flanked by Ascl and EcoRI, was cloned into pWalkman and used for gap repair. To verify the integrity of the BAC fragment throughout the construction, 10 PCR primer pairs spaced evenly throughout the 80 kb were used (see Table S1C for their sequences). The final construct was also verified by restriction digest analyses with several enzymes: Sall, KpnI, NotI, BamHI and sequencing of cloning junctions.

**Insertion of DNA elements by recombineering**

The insertion of *attB@nbs* and *attB@llp* were accomplished with bacterial recombineering using the *galk* positive-negative selection system (WARMING *et al.* 2005) essentially as described on the website <http://redrecombineering.ncifcrf.gov/>. Briefly, we generated the *galk* insert by PCR, using primers with flanking homology to the *nbs* region – nbsGalk-f and nbsGalk-r. This fragment was inserted at *nbs* at the position identical to that of the *attP* in the *nbs-attP* line (GAO *et al.* 2008) in the construct pWalkman{nbs-llp}, and clones were selected on galactose plates. Subsequently, *galk* was replaced by an *attB* insert with *nbs* flanking homology. Primers nbs2776-f and nbs3169-r were used to amplify *attB@nbs* from an existing construct (GAO *et al.* 2008). After the second round of recombineering, cells that retained *galk* were selected against on deoxygalactose plates. A similar procedure was followed for *attB@llp*, which was placed within the intergenic region between CG8177 and CG14168. The following primers were used to insert Galk: bac810Galk-f and bac810Galk-r; and attB: bac810\_attB-end with bac810\_attB-head. The success of *attB* placement in each case was verified by sequencing.

For I-SceI cut site insertion at position IS2, the I-SceI cut site at IS1 (described previously) was first removed by *galk* selection and replaced with original sequences in pP[acman]. Subsequently, a cut site was inserted at the new position, again using *galk* selection. The primers used were: up7993Galk-f and dn7993Galk-r for inserting *galk* at IS1; acman7929-f and acman8029-r for restoring IS1 site to pP[acman] sequences; up8150Galk-f and dn8150Galk-r for inserting *galk* at IS2. To insert the cut site at IS2, oligos up8150IS2-f and dn8150IS2-r were annealed and converted to dsDNA by a single round of DNA synthesis. This DNA was then used as template in a PCR with primers up8150IS2plus-f and dn8150IS2plus-r to generate PCR product used to replace *galk* at IS2.

**File S2**  
**Crossing schemes for induced reduction**

**I. Reduction by IScel**

1. FLP-mediated excision of vector sequences

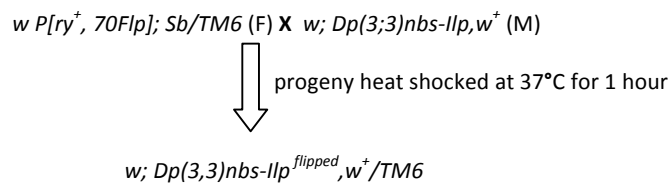

2. Reduction by I-SceI cutting

2.1. *I-SceI* on chromosome 2

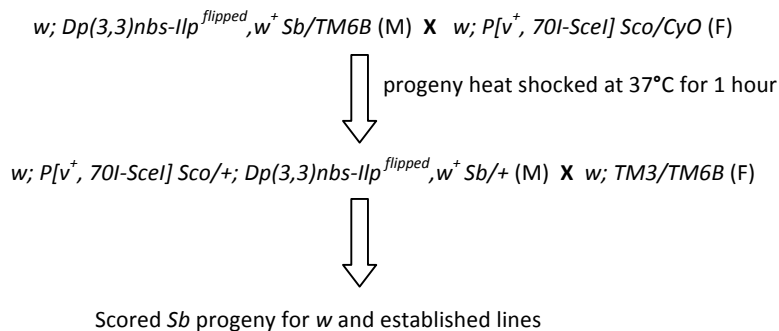

2.2. *I-SceI* on chromosome 3 (with *ligase 4* mutation)

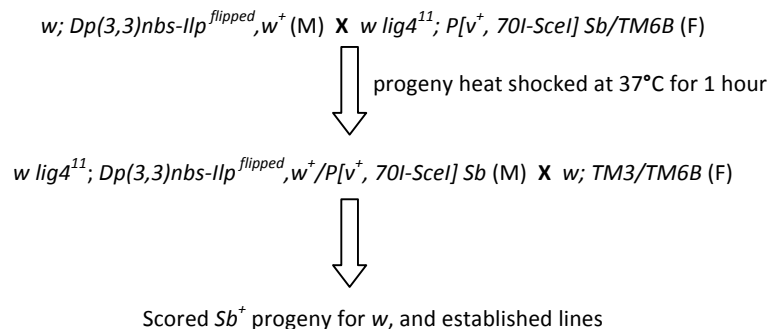

## II. Reduction by P transposase

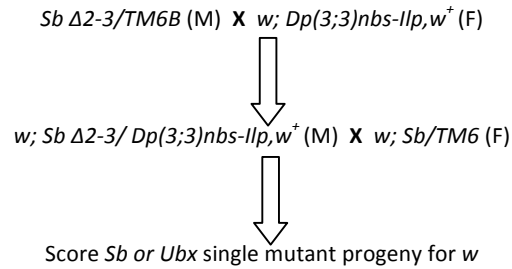

### Legend:

M and F stand for male and female respectively. A heat shock treatment to the progeny was administered on day 3 after the cross had been set up.  $Dp(3,3)nbs-llp, w^+$  indicates the 82kb duplication ( $Dp$ ) of the  $nbs-llp$  region marked with  $white^+$ .  $Dp(3,3)nbs-llp^{flipped}, w^+$  denotes the same duplication but with vector sequences excised by FLP recombinase. We did not verify the excision of the vector nor established an “excised” stock as FLP has been shown to function at virtually 100% efficiency under these conditions (GOLIC and LINDQUIST 1989, WEI and RONG 2007).  $pP[ry^+, 70FLP]$  is a  $hsp70$  promoter-driven  $FLP$  transgene on the X chromosome (GOLIC and LINDQUIST 1989).  $pP[v^+, 70I-SceI]$  is a  $hsp70$  promoter-driven  $I-SceI$  transgene (RONG and GOLIC 2003). We used one insertion on chromosome 2 marked with  $Sco$  and one on chromosome 3 marked with  $Sb$ . The  $lig4^{11}$  mutation was previously described (WEI and RONG 2007). A P transposase source is denoted as  $\Delta 2-3$ .

### References

- GAO, G., C. McMAHON, J. CHEN and Y. S. RONG, 2008 A powerful method combining homologous recombination and site-specific recombination for targeted mutagenesis in *Drosophila*. *Proc Natl Acad Sci U S A* **105**: 13999-14004.
- GOLIC, K. G., and S. LINDQUIST, 1989 The FLP recombinase of yeast catalyzes site-specific recombination in the *Drosophila* genome. *Cell* **59**: 499-509.
- RONG, Y. S., and K. G. GOLIC, 2003 The homologous chromosome is an effective template for the repair of mitotic DNA double-strand breaks in *Drosophila*. *Genetics* **165**: 1831-1842.
- WARMING, S., N. COSTANTINO, D. L. COURT, N. A. JENKINS and N. G. COPELAND, 2005 Simple and highly efficient BAC recombineering using galK selection. *Nucleic Acids Res* **33**: e36.
- WEI, D. S., and Y. S. RONG, 2007 A genetic screen for DNA double-strand break repair mutations in *Drosophila*. *Genetics* **177**: 63-77.

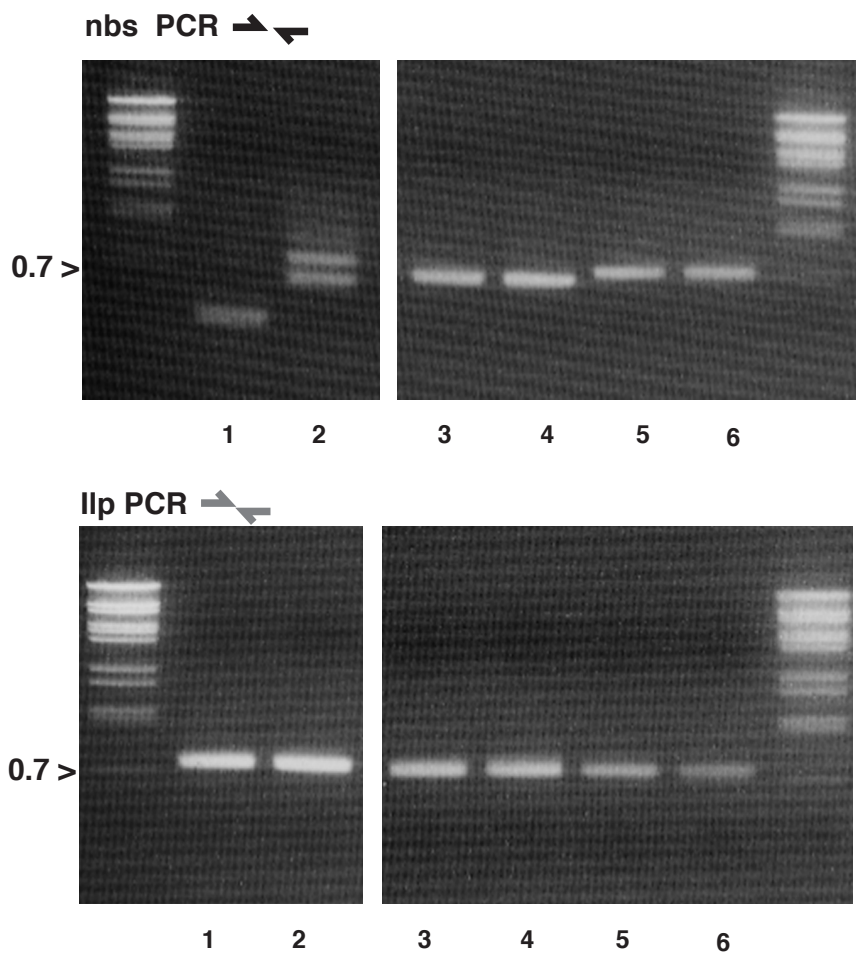

**Figure S1 Integration lines with possible rearrangement of the *nbs-Ilp* region.** Representative results for diagnostic PCR tests of integration lines showing abnormal patterns. Marker size is indicated to the left of the gel pictures in kb. At the top is the PCR test for the *nbs* region (for primer locations see Figure 1). At the bottom is the PCR test for the *Ilp* region. Lane 1: *wt*; lane 2: a duplication line from a previous integration at *attP@nbs*; lanes 3-6: additional integration lines from pWalkman{nbs-Ilp}S1 integration. Note that the absence of the *attB@Ilp* band in the lanes 3-6 suggests that the *attB* might have participated in an additional round of  $\phi$ IC31-mediated recombination.

### SNP at p35

PCR with primer pair bac416  
sequenced with primer bac416r

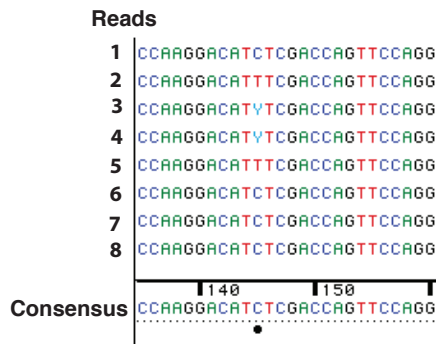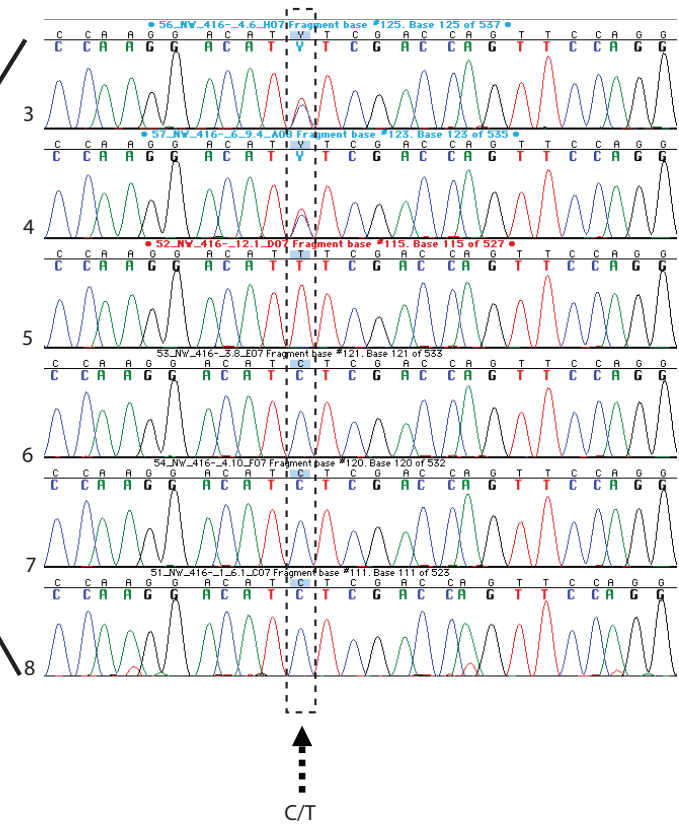

### indel at p44

PCR with primer pair bac502  
sequenced with primer bac502f

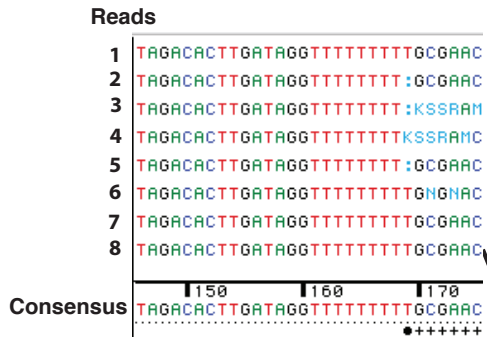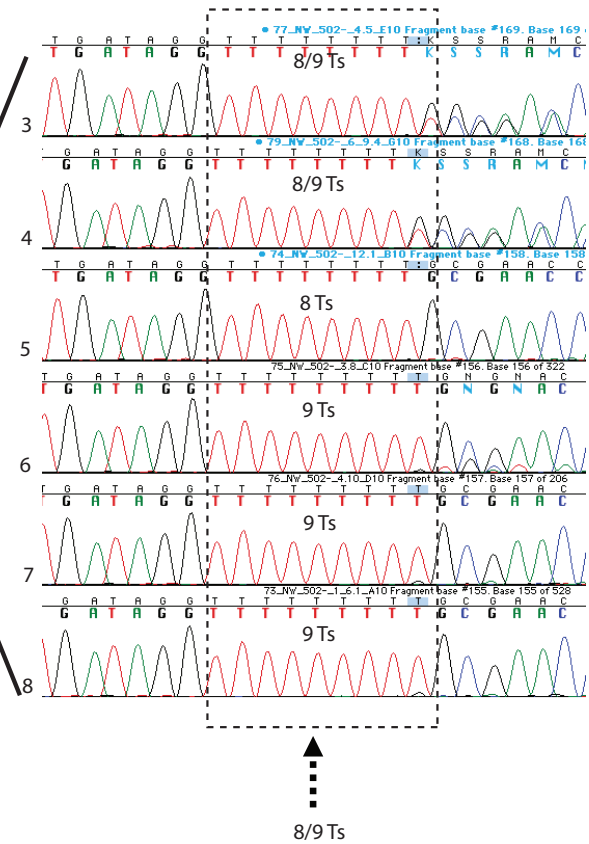

**Figure S2 Genotyping SNPs in reduction events.** Genotyping of the C/T SNP at position p35 is shown at the top. Sequences around the SNP region are shown for eight samples. Sample 1 was PCR amplified from pWalkman{nbs-llp} plasmid DNA showing a “C” at p35. Sample 2 was PCR amplified from genomic DNA of the starting line with *attP@nbs* showing a “T” at position p35. Samples 3 and 4 were amplified from genomic DNA of two NHEJ type lines (Figure 2). The sequencing data shown at the right displays a C/T double peak suggesting that both *nbs-llp* copies are present, which is consistent with NHEJ type events not being reduced. Samples 5-8 were derived from four lines that have been classified as “reduced” based on the PCR tests shown in Figures 1 and 2. Either a “C” or a “T” single peak was displayed in the sequencing data, consistent with the presence of a single *nbs-llp* copy. Genotyping of the T indel SNP at position p44 is shown at the bottom. The samples are the same as the ones used for genotyping p35. At this position, the *nbs-llp* region derived from the BAC clone (sample 1) has a string of nine “Ts”, while the chromosomal copy has eight (sample 2). For samples 3 and 4 (NHEJ type), the deletion of a single “T” resulted in the appearance of a double peak for all bases downstream of the indel, due the presence of both *nbs-llp* copies. For reduced samples (samples 5-8), the indel is homozygous, again consistent with the presence of only one *nbs-llp* copy.

**Table S1 Primers used for plasmid construction, gap repair, verification PCRs and PCR assays**

| <b>A. Primers used for plasmid construction</b>                                    |                                                     |
|------------------------------------------------------------------------------------|-----------------------------------------------------|
| <b>primer name</b>                                                                 | <b>sequence</b>                                     |
| ScBaNhSpMIBsSb+                                                                    | tagggataacagggtaatggatccgctagcatgcacgcgtacgcctgcagg |
| ScBaNhSpM1BsSb-                                                                    | cctgcaggcgtacgcgtcatgctagcggatccattaccctgttatcccta  |
| NheFRT48-plus                                                                      | ctaggaagttcctatacttctagagaataggaacttcggaataggaacttc |
| NheFRT48-minus                                                                     | ctaggaagttcctattccaagttcctattcttagaaagtataggaacttc  |
| SphFRT48-plus                                                                      | gaagttcctatacttctagagaataggaacttcggaataggaacttccatg |
| SphFRT48-minus                                                                     | gaagttcctattccaagttcctattcttagaaagtataggaacttccatg  |
| <b>B. Primers used for gap repair</b>                                              |                                                     |
| <b>primer name</b>                                                                 | <b>sequence</b>                                     |
| bacL-f                                                                             | GCGGAGTTTCGATAAAACAAG                               |
| bacL_NotI-r                                                                        | ctcaagcggcgcCTACGATAACAACACCTGCC                    |
| bacL_AscI-f                                                                        | gtcaagcggcgcGCGGAGTTTCGATAAAACAAG                   |
| bacR-r                                                                             | CTCGGCTATCTCGACTATCTCG                              |
| bacR_NotI-f                                                                        | gacaagcggcgcCTCGAGGTCGTTGTGGTTGTG                   |
| bacR_EcoRI-r                                                                       | cagttgaattcCTCGGCTATCTCGACTATCTCG                   |
| <b>C. Primers used for verification of nbs-llp region integrity during cloning</b> |                                                     |
| <b>primer name</b>                                                                 | <b>sequence</b>                                     |
| bac074-f                                                                           | gtatcgggatgcatcgaagt                                |
| bac074-r                                                                           | agagaaaatggccggagaat                                |
| bac064-f                                                                           | gctccaatcgtcctcatcat                                |
| bac064-r                                                                           | caggtgtgttggggaatac                                 |
| bac165-f                                                                           | AGCCGGTTTGTTTTGTGTC                                 |
| bac165-r                                                                           | CTCGACGGTATCGTGGCTAT                                |
| bac267-f                                                                           | TCTACGTCATGGAGCACGAG                                |
| bac267-r                                                                           | ATTCATGGTTCCAGCGTCTC                                |
| bac320-f                                                                           | TCTTGAACTGCAGCACATCC                                |
| bac320-r                                                                           | CAACAACATGGGGCACTAGA                                |
| bac416-f                                                                           | CTCCCGACTCAACACCGTAT                                |
| bac416-r                                                                           | CCAGCTATGCCAAGTTCACA                                |
| bac502-f                                                                           | AGCAATACCAGGGGACAGTG                                |
| bac502-r                                                                           | AACGAAACGTAACCGACAGG                                |
| bac600-f                                                                           | TCGTCGATCTCTGGGTCTTT                                |
| bac600-r                                                                           | AGGCGTGAATAATGCGATTC                                |
| bac729-f                                                                           | ACGAGAAGCACGTCCAGTTT                                |
| bac729-r                                                                           | TCTGTTCAATGGGGCTAAGG                                |
| bac835-f                                                                           | AGGATGGAGGCTTGAGGATT                                |

bac835-r TTATCCCGGAATGCTTTGAG

---

**D. Primers used for verification of gap repair junctions**

---

| <b>primer name</b> | <b>sequence</b>        |
|--------------------|------------------------|
| baclj-f            | GATTGGGTATCATCGTTGGG   |
| acman_7520d        | GGATCAAGAGCTACCAACTG?? |
| acman_8363u        | CGCTGACTTTGAGTGAATG    |
| bacRend-f          | CTCCTCGTTCTCCCTGCACATG |
| acman7929-f        | gtgtaaacgacggccagt     |
| acman8261-r        | gttcaatgatccagtgacg    |

---

**E. Primers used for positioning attachment sites (attB) at a) nbs locus and b) llp locus**

---

**a) attB at nbs**

---

| <b>primer name</b> | <b>sequence</b>                                                         |
|--------------------|-------------------------------------------------------------------------|
| nbsGalk-f          | ggctgatggtatgtaacctgtttaatgtcgtgcctaaacgtaattaaCCTGTTGACAATTAATCATCGGCA |
| nbsGalk-r          | tatttcgcaagtttattgtagcaaaataaagtaactttacaagcgacggTCAGCACTGTCCTGCTCCTT   |
| nbs2776-f          | ccaggaactgaatcctct                                                      |
| nbs3169-r          | cggccgcaagaactttaaga                                                    |

---

**b) attB at llp**

---

|                 |                                                                                        |
|-----------------|----------------------------------------------------------------------------------------|
| bac810Galk_f    | cacaatgaaatgatactaacgatacttaaaaacgtgttcaaaccttgtcaatattgtaaaaaacctgttgacaattaatcatcgga |
| bac810Galk_r    | caaatggtcatctgaccaaattcctaaatgaagagaatgttgttgcctttttgaatatcagcactgtcctgctcctt          |
| bac810_att-end  | cacaatgaaatgatactaacgatacttaaaaacgtgttcaaaccttgtcaatattgtaaaaaatcgataccgtcgacatgcc     |
| bac810_att-head | caaatggtcatctgaccaaattcctaaatgaagagaatgttgttgcctttttgaatattcgacgatgtaggtcacggt         |

---

**F. Primers used for a) removing I-SceI at IS1 and b) placing a new one at IS2**

---

**a) removing I-SceI at IS1**

---

| <b>primer name</b> | <b>sequence</b>                                                                   |
|--------------------|-----------------------------------------------------------------------------------|
| up7993Galk-f       | ccagtgagcgcgtaatacgaactcactatagggcgaattggagctcgttt <b>cctgttgacaattaatcatcgga</b> |
| dn7993Galk-r       | gaccgctcaggttctcgcaggcgtacgctgcatgctagcggatcc <b>tcagcactgtcctgctcctt</b>         |
| acman7929-f        | gtgtaaacgacggccagt                                                                |
| acman8029-r        | gccggcgcgccatcgataac                                                              |

**a) placing I-SceI at IS2**

---

| <b>primer name</b> | <b>sequence</b>                                                                     |
|--------------------|-------------------------------------------------------------------------------------|
| up8150Galk-f       | GCGATAGAATGAGTGCAGGCCGAGATAGTCGAGATAGCCGAGATAACAATAC <b>cctgttgacaattaatcatcgga</b> |
| dn8150Galk-r       | ctactttcccaaaaatgggttttattaacttacatacatactagaattc <b>tcagcactgtcctgctcctt</b>       |
| up8150IS2-f        | GCGATAGAATGAGTGCAGGCCGAGATAGTCGAGATAGCCGAGATAACAATAC <b>ATTACCCTGTTATCCCTA</b>      |



dn8150IS2-r                    ctactttccgcaaaaatgggttttattaacttacatacactagaattc **TAGGGATAACAGGGTAAT**

up8150IS2plus-f                *CTAGATATCGCCCGATT*CAGATGCGGATATGGGAATGTGGCGATAGAATGAGTGGGAGG

dn8150IS2plus-r                ctactttccgcaaaaatggg

---

**G. Primers used for attachment site PCR assay**

---

| <b>primer name</b> | <b>sequence</b>       |
|--------------------|-----------------------|
| nbs2858            | caatcgcaagttgtccaagg  |
| nbs3169            | cggccgcaagaacttaaga   |
| bac810L-f          | cgataatcgaatgcactgaag |
| bac810R-r          | ccagtcaactgcaatcgtag  |

---
