# Supplementary material
Source: PubMed Central journal article supplement (PMC3567732)
Supplement: 807f0f0e4f1aab89270ec70726216e15_genetics.112.145631-6.pdf [file 807f0f0e4f1aab89270ec70726216e15_genetics.112.145631-6.pdf]

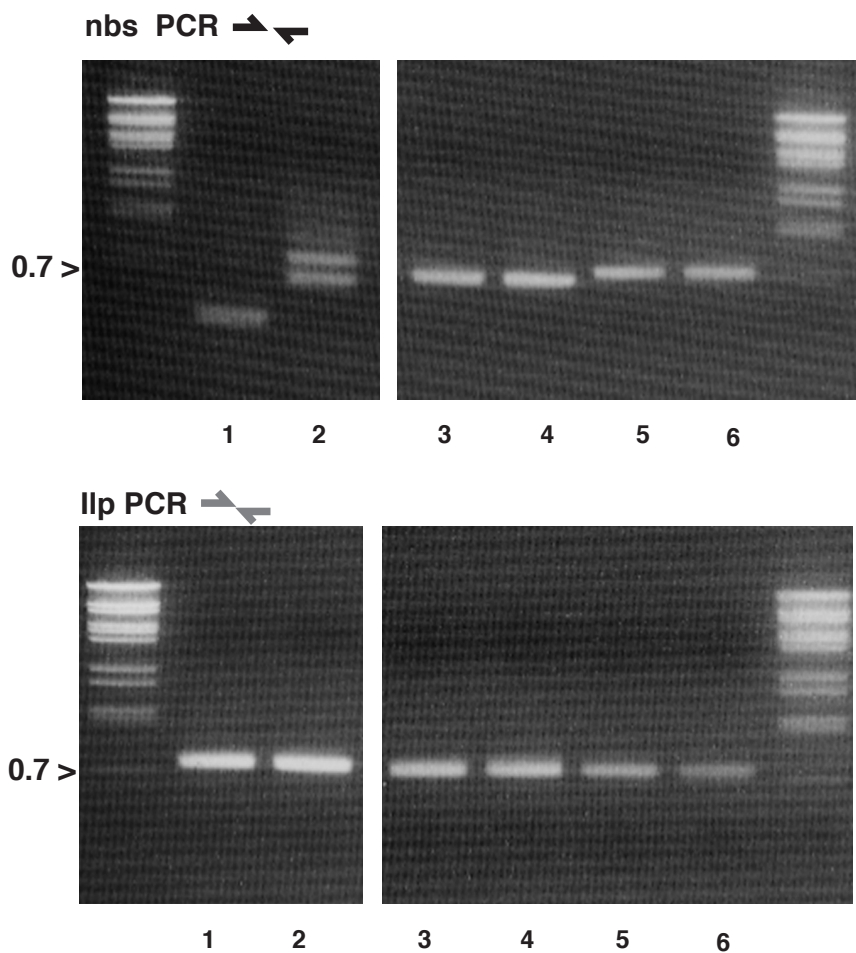

**Figure S1 Integration lines with possible rearrangement of the *nbs-Ilp* region.** Representative results for diagnostic PCR tests of integration lines showing abnormal patterns. Marker size is indicated to the left of the gel pictures in kb. At the top is the PCR test for the *nbs* region (for primer locations see Figure 1). At the bottom is the PCR test for the *Ilp* region. Lane 1: *wt*; lane 2: a duplication line from a previous integration at *attP@nbs*; lanes 3-6: additional integration lines from pWalkman{nbs-Ilp}S1 integration. Note that the absence of the *attB@Ilp* band in the lanes 3-6 suggests that the *attB* might have participated in an additional round of  $\phi$ IC31-mediated recombination.
