# Supplementary material
Source: PubMed Central journal article supplement (PMC3567732)
Supplement: 4163d7b0824f59c5e596bb27e2c6b43e_genetics.112.145631-2.pdf [file 4163d7b0824f59c5e596bb27e2c6b43e_genetics.112.145631-2.pdf]

**File S2**  
**Crossing schemes for induced reduction**

**I. Reduction by IScel**

1. FLP-mediated excision of vector sequences

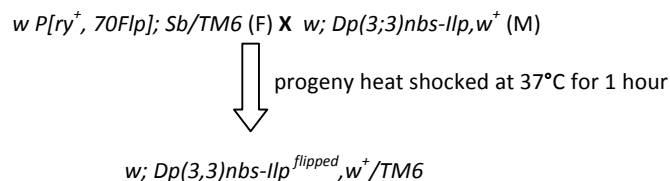

2. Reduction by I-SceI cutting

2.1. *I-SceI* on chromosome 2

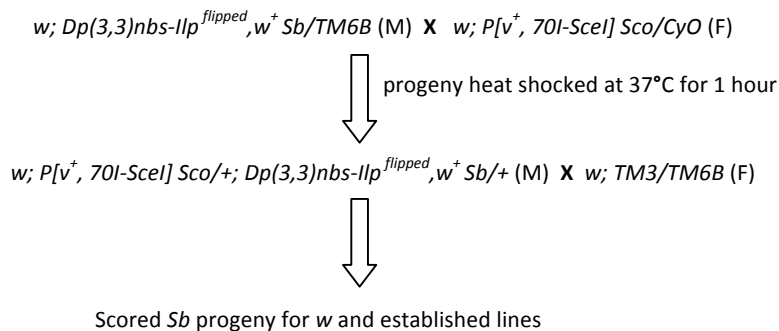

2.2. *I-SceI* on chromosome 3 (with *ligase 4* mutation)

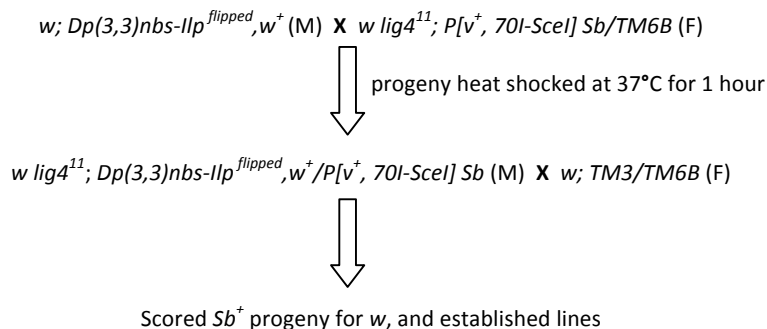

## II. Reduction by P transposase

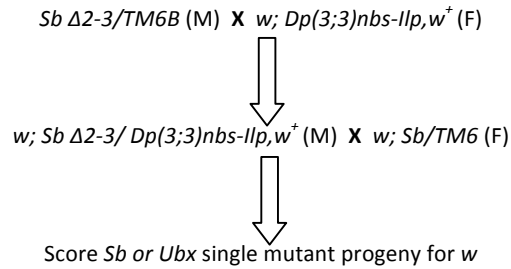

### Legend:

M and F stand for male and female respectively. A heat shock treatment to the progeny was administered on day 3 after the cross had been set up. *Dp(3,3)nbs-llp, w<sup>+</sup>* indicates the 82kb duplication (*Dp*) of the *nbs-llp* region marked with *white<sup>+</sup>*. *Dp(3,3)nbs-llp<sup>flipped</sup>, w<sup>+</sup>* denotes the same duplication but with vector sequences excised by FLP recombinase. We did not verify the excision of the vector nor established an “excised” stock as FLP has been shown to function at virtually 100% efficiency under these conditions (GOLIC and LINDQUIST 1989, WEI and RONG 2007). *pP[ry<sup>+</sup>, 70FLP]* is a *hsp70* promoter-driven *FLP* transgene on the X chromosome (GOLIC and LINDQUIST 1989). *pP[v<sup>+</sup>, 70I-SceI]* is a *hsp70* promoter-driven *I-SceI* transgene (RONG and GOLIC 2003). We used one insertion on chromosome 2 marked with *Sco* and one on chromosome 3 marked with *Sb*. The *lig4<sup>11</sup>* mutation was previously described (WEI and RONG 2007). A P transposase source is denoted as  $\Delta 2-3$ .

### References

- GAO, G., C. McMAHON, J. CHEN and Y. S. RONG, 2008 A powerful method combining homologous recombination and site-specific recombination for targeted mutagenesis in *Drosophila*. *Proc Natl Acad Sci U S A* **105**: 13999-14004.
- GOLIC, K. G., and S. LINDQUIST, 1989 The FLP recombinase of yeast catalyzes site-specific recombination in the *Drosophila* genome. *Cell* **59**: 499-509.
- RONG, Y. S., and K. G. GOLIC, 2003 The homologous chromosome is an effective template for the repair of mitotic DNA double-strand breaks in *Drosophila*. *Genetics* **165**: 1831-1842.
- WARMING, S., N. COSTANTINO, D. L. COURT, N. A. JENKINS and N. G. COPELAND, 2005 Simple and highly efficient BAC recombineering using galK selection. *Nucleic Acids Res* **33**: e36.
- WEI, D. S., and Y. S. RONG, 2007 A genetic screen for DNA double-strand break repair mutations in *Drosophila*. *Genetics* **177**: 63-77.
