# Supplementary material
Source: PubMed Central journal article supplement (PMC3567732)
Supplement: fbd3a44b6b7ca0a30cfef59c00c1527e_genetics.112.145631-5.pdf [file fbd3a44b6b7ca0a30cfef59c00c1527e_genetics.112.145631-5.pdf]

**Table S1 Primers used for plasmid construction, gap repair, verification PCRs and PCR assays**

| <b>A. Primers used for plasmid construction</b>                                    |                                                     |
|------------------------------------------------------------------------------------|-----------------------------------------------------|
| <b>primer name</b>                                                                 | <b>sequence</b>                                     |
| ScBaNhSpMIBsSb+                                                                    | tagggataacagggtaatggatccgctagcatgcacgcgtacgcctgcagg |
| ScBaNhSpM1BsSb-                                                                    | cctgcaggcgtacgcgtcatgctagcggatccattaccctgttatcccta  |
| NheFRT48-plus                                                                      | ctaggaagttcctatacttctagagaataggaacttcggaataggaacttc |
| NheFRT48-minus                                                                     | ctaggaagttcctattccaagttcctattcttagaaagtataggaacttc  |
| SphFRT48-plus                                                                      | gaagttcctatacttctagagaataggaacttcggaataggaacttccatg |
| SphFRT48-minus                                                                     | gaagttcctattccaagttcctattcttagaaagtataggaacttccatg  |
| <b>B. Primers used for gap repair</b>                                              |                                                     |
| <b>primer name</b>                                                                 | <b>sequence</b>                                     |
| bacL-f                                                                             | GCGGAGTTTCGATAAAACAAG                               |
| bacL_NotI-r                                                                        | ctcaagcggcgcCTACGATAACAACACCTGCC                    |
| bacL_AscI-f                                                                        | gtcaagcggcgcGCGGAGTTTCGATAAAACAAG                   |
| bacR-r                                                                             | CTCGGCTATCTCGACTATCTCG                              |
| bacR_NotI-f                                                                        | gacaagcggcgcCTCGAGGTCGTTGTGGTTGTG                   |
| bacR_EcoRI-r                                                                       | cagttgaattcCTCGGCTATCTCGACTATCTCG                   |
| <b>C. Primers used for verification of nbs-llp region integrity during cloning</b> |                                                     |
| <b>primer name</b>                                                                 | <b>sequence</b>                                     |
| bac074-f                                                                           | gtatcgggatgcatcgaagt                                |
| bac074-r                                                                           | agagaaaatggccggagaat                                |
| bac064-f                                                                           | gctccaatcgtcctcatcat                                |
| bac064-r                                                                           | caggtgtgttggggaatac                                 |
| bac165-f                                                                           | AGCCGGTTTGTTTTGTGTC                                 |
| bac165-r                                                                           | CTCGACGGTATCGTGGCTAT                                |
| bac267-f                                                                           | TCTACGTCATGGAGCACGAG                                |
| bac267-r                                                                           | ATTCATGGTTCCAGCGTCTC                                |
| bac320-f                                                                           | TCTTGAACTGCAGCACATCC                                |
| bac320-r                                                                           | CAACAACATGGGGCACTAGA                                |
| bac416-f                                                                           | CTCCCGACTCAACACCGTAT                                |
| bac416-r                                                                           | CCAGCTATGCCAAGTTCACA                                |
| bac502-f                                                                           | AGCAATACCAGGGGACAGTG                                |
| bac502-r                                                                           | AACGAAACGTAACCGACAGG                                |
| bac600-f                                                                           | TCGTCGATCTCTGGGTCTTT                                |
| bac600-r                                                                           | AGGCGTGAATAATGCGATTC                                |
| bac729-f                                                                           | ACGAGAAGCACGTCCAGTTT                                |
| bac729-r                                                                           | TCTGTTCAATGGGGCTAAGG                                |
| bac835-f                                                                           | AGGATGGAGGCTTGAGGATT                                |

bac835-r TTATCCCGGAATGCTTTGAG

---

**D. Primers used for verification of gap repair junctions**

---

| <b>primer name</b> | <b>sequence</b>        |
|--------------------|------------------------|
| baclj-f            | GATTGGGTATCATCGTTGGG   |
| acman_7520d        | GGATCAAGAGCTACCAACTG?? |
| acman_8363u        | CGCTGACTTTGAGTGAATG    |
| bacRend-f          | CTCCTCGTTCTCCCTGCACATG |
| acman7929-f        | gtgtaaacgacggccagt     |
| acman8261-r        | gttcaatgatccagtgag     |

---

**E. Primers used for positioning attachment sites (attB) at a) nbs locus and b) llp locus**

---

**a) attB at nbs**

---

| <b>primer name</b> | <b>sequence</b>                                                         |
|--------------------|-------------------------------------------------------------------------|
| nbsGalk-f          | ggctgatggtatgtaacctgtttaatgtcgtgcctaaacgtaattaaCCTGTTGACAATTAATCATCGGCA |
| nbsGalk-r          | tatttcgcaagtttattgtagcaaaataaagtaactttacaagcgacggTCAGCACTGTCCTGCTCCTT   |
| nbs2776-f          | ccaggaactgaatcctct                                                      |
| nbs3169-r          | cggccgcaagaactttaaga                                                    |

---

**b) attB at llp**

---

|                 |                                                                                      |
|-----------------|--------------------------------------------------------------------------------------|
| bac810Galk_f    | cacaatgaaatgatactaacgatacttaaaaacgtgttcaaaccttgtcaatattgtaaaaaacgttgacaattaatcatcgga |
| bac810Galk_r    | caaatggtcatctgaccaaattcctaaatgaagagaatgttgttgctttttgaatcagcactgtcctgctcctt           |
| bac810_att-end  | cacaatgaaatgatactaacgatacttaaaaacgtgttcaaaccttgtcaatattgtaaaaaatcgataccgtcgacatgcc   |
| bac810_att-head | caaatggtcatctgaccaaattcctaaatgaagagaatgttgttgctttttgaatcagcactgttaggtcagcgt          |

---

**F. Primers used for a) removing I-SceI at IS1 and b) placing a new one at IS2**

---

**a) removing I-SceI at IS1**

---

| <b>primer name</b> | <b>sequence</b>                                                                  |
|--------------------|----------------------------------------------------------------------------------|
| up7993Galk-f       | ccagtgagcgcgtaatacgaactcactatagggcgaattggagctcttt <b>cctgttgacaattaatcatcgga</b> |
| dn7993Galk-r       | gaccgctcaggttctcgcagcgctacgctgcatgctagcggatcc <b>tcagcactgtcctgctcctt</b>        |
| acman7929-f        | gtgtaaacgacggccagt                                                               |
| acman8029-r        | gccggcgcgccatcgataac                                                             |

---

**a) placing I-SceI at IS2**

---

| <b>primer name</b> | <b>sequence</b>                                                                    |
|--------------------|------------------------------------------------------------------------------------|
| up8150Galk-f       | GCGATAGAATGAGTGCAGGCCGAGATAGTCGAGATAGCCGAGATACAATAC <b>cctgttgacaattaatcatcgga</b> |
| dn8150Galk-r       | ctacttccgcaaaaatgggttttattaacttacatacatactagaatc <b>tcagcactgtcctgctcctt</b>       |
| up8150IS2-f        | GCGATAGAATGAGTGCAGGCCGAGATAGTCGAGATAGCCGAGATACAATAC <b>ATTACCCTGTTATCCCTA</b>      |

dn8150IS2-r                    ctactttccgcaaaaatgggttttattaacttacatacactagaattc **TAGGGATAACAGGGTAAT**

up8150IS2plus-f                *CTAGATATCGCCCGATT*CAGATGCGGATATGGGAATGTGGCGATAGAATGAGTGGGAGG

dn8150IS2plus-r                ctactttccgcaaaaatggg

---

**G. Primers used for attachment site PCR assay**

---

| <b>primer name</b> | <b>sequence</b>       |
|--------------------|-----------------------|
| nbs2858            | caatcgcaagttgtccaagg  |
| nbs3169            | cggccgcaagaacttaaga   |
| bac810L-f          | cgataatcgaatgcactgaag |
| bac810R-r          | ccagtcaactgcaatcgtag  |

---
